# Supplementary material for: Mosaic Segmental and Whole-Chromosome Upd(11)mat in Silver-Russell Syndrome
Source: Genes (Basel). 2021 Apr 16;12(4):581. doi: 10.3390/genes12040581 (PMC8073375; doi:10.3390/genes12040581)
Supplement: Supplementary file 1 [file genes-12-00581-s001.zip]

Archive with 4 entries (4 files):
- FigureS1.pdf
- __MACOSX/._FigureS1.pdf
- Table S1.xlsx
- __MACOSX/._Table S1.xlsx
