# Supplementary material for: Mosaic Segmental and Whole-Chromosome Upd(11)mat in Silver-Russell Syndrome
Source: Genes (Basel). 2021 Apr 16;12(4):581. doi: 10.3390/genes12040581 (PMC8073375; doi:10.3390/genes12040581)
Supplement: Supplementary file 1 [file genes-12-00581-s001.zip › Table S1.xlsx]

## Sheet: Foglio1
	Table S1. Copy number and DNA methylation values of several imprinted loci obtained by MS-MLPA.
	Sample		H19/IGF2:IG-DMR	KCNQ1OT1:TSS-DMR	PLAGL1:alt-TSS-DMR	GNAS-NESP:TSS DMR	GNAS-Upstream	GNAS-AS1:TSS-DMR	GNAS-XL :Ex1-DMR	MEST:alt-TSS-DMR	GRB10:alt-TSS-DMR	MEG3:TSS-DMR	PEG3:TSS-DMR	SNRPN:alt-TSS-DMR
	Copy number
	Family 1	I-1	0.933333	0.89	1.01	1.04	0.82	0.87	1.005	0.945	1.04	0.915	0.986667	1.015
		I-2	1.03667	1.045	0.94	1.01	1.06	1.1	1.035	1.005	1.01	0.985	1.03	1.045
		II-1	1.04	0.985	1	1.03	0.98	1.01	1.05	0.995	0.97	0.98	1.01	1.005
	Family 2	I-1	1.27333	1.1	0.8	1.24	0.99	1.16	1.2	0.9	1.25	1.3	0.876667	0.965
		I-2	1.16667	1.03	0.93	1.3	0.98	1.19	1.195	1.025	1.17	1.21	0.916667	0.965
		II-1	0.966667	0.94	1.06	1.01	0.9	0.92	0.995	0.98	1.07	0.98	0.983333	1.025
	Ctrl		1.00292	1.00063	1.00375	1.0025	1.0025	0.995	1.00188	1.00063	0.9975	0.998125	1	1.00187
	S.D.		0.0742779	0.0376774	0.0636817	0.0406202	0.0714643	0.0501427	0.0411856	0.0509207	0.0643095	0.0530684	0.0472735	0.0477799
	DNA methylation
	Family 1	I-1	0.523333	0.56	0.53	0,44**	0.56	0.57	0.51	0.56	0.54	0,6*	0,60*	0.51
		I-2	0.473333	0.495	0.49	0.57	0.45	0.49	0.485	0.475	0.48	0.5	0.516667	0.43
		II-1	0.4	0.705	0.49	0.52	0.51	0.56	0.555	0.53	0.56	0.51	0.52	0.475
	Family 2	I-1	0.546667	0.57	0.55	0.52	0.52	0.61	0.585	0.57	0.6	0.545	0.576667	0.5
		I-2	0.56	0.575	0.58	0.56	0.47	0.55	0.525	0.54	0.58	0.565	0.576667	0.53
		II-1	0.52	0.55	0.58	0.53	0.46	0.6	0.535	0.57	0.6	0.545	0.576667	0.5
	Ctrl		0.52625	0.528125	0.52	0.545	0.49125	0.53875	0.498125	0.51375	0.53125	0.52625	0.52125	0.49375
	S.D.		0.0520712	0.0735952	0.0342261	0.0316228	0.0364251	0.0368152	0.0504934	0.0282548	0.0322656	0.0324294	0.0298274	0.0375722
	Control values derived from the average of 7 normal samples.
	Copy number values < 0.7 are considered deletions, > 1.3 are considered duplications.
	Methylation values exceeding +/- 2 standard deviation from control average are in bold red.
	*Border line values.
	**This low value is not considered significant because the values of the the other CpGs of the locus have normal methylation and no clinical phenotype has been reported.
