# Supplementary figures and images for: Mosaic Segmental and Whole-Chromosome Upd(11)mat in Silver-Russell Syndrome
Source: MDPI journal article supplement (doi:10.3390/genes12040581), 2021-04-16

## I-1 of family 1

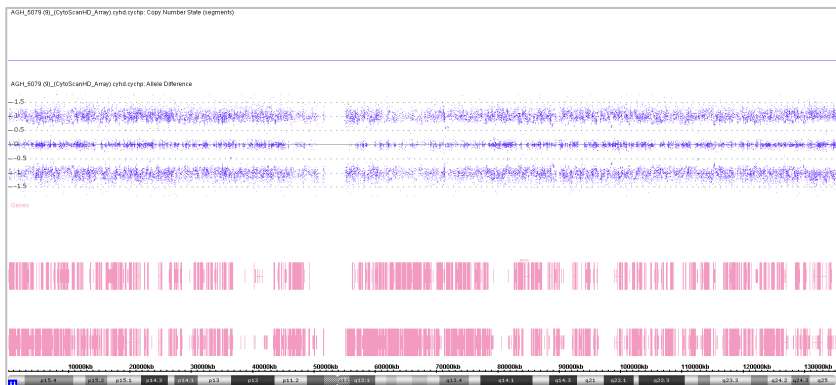

## I-2 of family 1

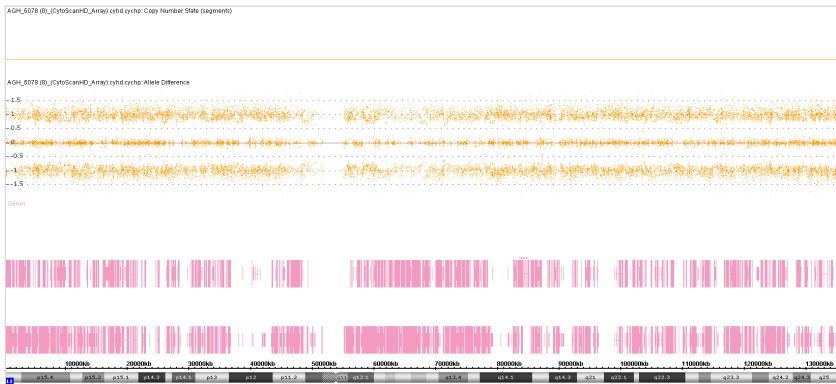

Supplement: s1 [file s1]
